# Supplementary material for: Quantitative Analytical and Computational Workflow for Large-Scale Targeted Plasma Metabolomics
Source: MDPI journal article supplement (doi:10.3390/metabo13070844), 2023-07-13
Supplement: s1 [file s1]

# Supplementary Figures

## **Quantitative analytical and computational workflow for large-scale targeted plasma metabolomics**

*Antonia Fecke, Nay Min Min Thaw Saw, Dipali Kale, Siva Swapna Kasarla, Albert Sickmann, Prasad Phapale\**

Supplementary Figure 1

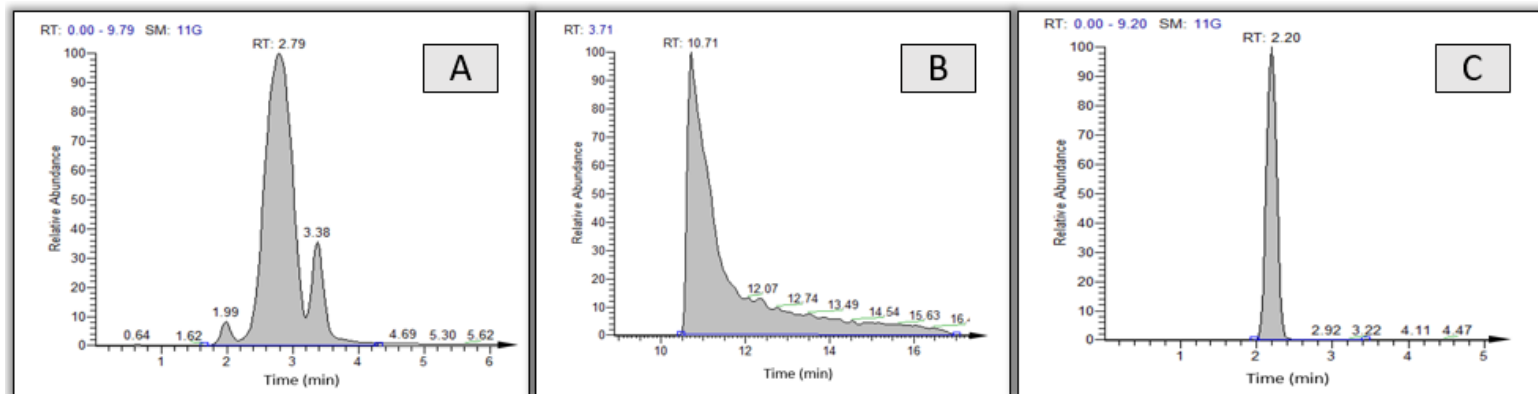

Supplementary Figure 1: Example of the categories assigned during manual curation of peak shapes. A shows an example of a split peak which is split close to the baseline, B and example of a broad peak and C and example of a good peak.
