# Supplementary material for: Quantitative Analytical and Computational Workflow for Large-Scale Targeted Plasma Metabolomics
Source: Metabolites. 2023 Jul 13;13(7):844. doi: 10.3390/metabo13070844 (PMC10383057; doi:10.3390/metabo13070844)
Supplement: Supplementary file 1 [file metabolites-13-00844-s001.zip › metabolites-2410225-supplementary.xlsx]

## Sheet: Info
Quantitative analytical and computational workflow for large-scale targeted plasma metabolomics
Antonia Fecke, Nay Min Min Thaw Saw, Dipali Kale, Siva Swapna Kasarla, Albert Sickmann, Prasad Phapale*
Supplementary Table 1: Information on the standards used in this study containing name, HMDB, superclass, mass, precursor masses and RT. All standards were purchased from MetaSci, USA
Supplementary Table 2: Information on the standards used in this study (Z-HILIC) containing name, HMDB, superclass, mass, precursor masses and RT. All standards were purchased from MetaSci, USA
Supplementary Table 3: Information on internal standards used in this study showing the name, an identifier the molecular formula, the internal standard group and the selection of reference compounds
Supplementary Table 4: a) Comparison of NIST standard reference material metabolite values from literature with RRF quantification using 6 reference compounds in positive ESI.
b) Comparison of NIST standard reference material metabolite values from literature with RRF quantification using 6 reference compounds in positive ESI.

## Sheet: S-Table 1
Table 12: Information on the standards used in this study containing name, HMDB, superclass, mass, precursor masses and RT. All standards were purchased from Metasci, USA
Name	HMDB	Superclass	Molecular Formula	Mass	[M+H]+	[M-H]-	Solvent	RT min (positive mode BEH Amide)	RT min(negative mode BEH Amide)
α-Glucose	HMDB0003345	Organic oxygen compounds	C6H12O6	180.063	181.071	179.056	Water	NA	3.51
Biotin	HMDB0000030	Organoheterocyclic compounds	C10H16N2O3S	244.088	245.095	243.081	Water	2.16	1.98
Fructose-6-Phosphate	HMDB0000124	Organic oxygen compounds	C6H13O9P	260.03	261.037	259.022	Water	10.34	7.38;9.69; 10.32
Fructose 1,6-bisphosphate	HMDB0001058	Organic oxygen compounds	C6H14O12P2	339.996	341.003	338.989	Water	10.59	10.58
Guanosine 5′-diphosphate	HMDB0001201	Nucleosides, nucleotides, and analogues	C10H15N5O11P2	443.024	444.032	442.017	Water	10.34	10.09; 10.58
Itaconic acid	HMDB0002092	Lipids and lipid-like molecules	C5H6O4	130.027	131.034	129.019	Water	NA	1.34
α-Ketoglutaric acid	HMDB0000208	Organic acids and derivatives	C5H6O5	146.022	147.029	145.014	Water	10.64	2.99; 10.62
(+)-Lactic acid	HMDB0000190	Organic acids and derivatives	C3H6O3	90.0317	91.039	89.0244	Water	NA	1.94
Oxaloacetic acid	HMDB0000223	Organic acids and derivatives	C4H4O5	132.006	133.013	130.999	Water	NA	10.62
Pyruvate	HMDB0000243	Organic acids and derivatives	C3H4O3	88.016	89.0233	87.0088	Water	NA	0.69;2.69
Phospho(enol)pyruvic acid	HMDB0000263	Organic acids and derivatives	C3H5O6P	167.982	168.99	166.975	Water	7.47; 9.52	7.40; 9.47
D(−)-3-Phosphoglyceric acid	HMDB0000807	Organic oxygen compounds	C3H7O7P	185.993	187	184.986	Water	10.49	8.61; 10.45
Xylulose 5-phosphate	HMDB0000868	Organic oxygen compounds	C5H11O8P	230.019	231.026	229.012	Water	5.70; 7.44	5.51
2-Deoxyribose 5-phosphate	HMDB0001031	Organic oxygen compounds	C5H11O7P	214.024	215.031	213.017	Water	NA	6.24; 4.65
Erythrose 4-phosphate	HMDB0001321	Organic oxygen compounds	C4H9O7P	200.009	201.016	199.001	Water	NA	3.01
Gluconolactone	HMDB0000150	Organic oxygen compounds	C6H10O6	178.048	179.055	177.041	Water	3.42	NA
Glucose 6-Phosphate	HMDB0001401	Organic oxygen compounds	C6H13O9P	260.03	261.037	259.022	Water	7.42; 9.68; 10.33	7.38;9.69; 10.32
6Phosphogluconic acid	HMDB0001316	Organic oxygen compounds	C6H13O10P	276.025	277.032	275.017	Water	10.25	10.26
Acetyl coenzyme A	HMDB0001206	Lipids and lipid-like molecules	C23H38N7O17P3S	809.126	810.133	808.119	Water	6	6.04
Citric acid	HMDB0000094	Organic acids and derivatives	C6H8O7	192.027	193.034	191.02	Water	10.62	10.6
Malic acid	HMDB0000156	Organic acids and derivatives	C4H6O5	134.022	135.029	133.014	Water	NA	3.44
Succinyl coenzyme A	HMDB0001022	Lipids and lipid-like molecules	C25H40N7O19P3S	867.131	868.139	866.124	Water	NA	NA
Adenosine 5-monophosphate	HMDB0000045	Nucleosides, nucleotides, and analogues	C10H14N5O7P	347.063	348.07	346.056	Water	2.57	5.28
Glycine	HMDB0000123	Organic acids and derivatives	C2H5NO2	75.032	348.07	74.0248	Water	5.38	5.4
Serine	HMDB0000187	Organic acids and derivatives	C3H7NO3	105.043	106.05	104.035	Water	6.19	6.26
Aspartic Acid	HMDB0000191	Organic acids and derivatives	C4H7NO4	133.037	134.045	132.03	Water	6.05	6.12
Threonine	HMDB0000167	Organic acids and derivatives	C4H9NO3	119.058	120.066	118.051	Water	5.33	5.31
Valine	HMDB0000883	Organic acids and derivatives	C5H11NO2	117.079	118.086	116.072	Water	3.67	3.69
Proline	HMDB0000162	Organic acids and derivatives	C5H9NO2	115.063	116.071	114.056	Water	3.75	3.77
Glutamic Acid	HMDB0000148	Organic acids and derivatives	C5H9NO4	147.053	148.06	146.046	Water	5.52	5.51
Cystine	HMDB0000192	Organic acids and derivatives	C6H12N2O4S2	240.024	241.031	239.017	Water	10.77	10.76
Leucine	HMDB0000687	Organic acids and derivatives	C6H13NO2	131.095	132.102	130.087	Water	3.26	3.24
trans-Aconitic acid	HMDB0000958	Organic acids and derivatives	C6H6O6	174.016	175.024	173.009	Water	NA	2.62; 3.40; 5.14
Taurine	HMDB0000251	Organic acids and derivatives	C2H7NO3S	125.015	126.022	124.007	ACN+Water	3.53	3.51
Maleic acid	HMDB0000176	Organic acids and derivatives	C4H4O4	116.011	117.018	115.004	Water	NA	0.6
Maltotriose	HMDB0001262	Organic oxygen compounds	C18H32O16	504.169	505.176	503.162	Water	10.27	10.23
2-Piperidinone	HMDB0011749	Organoheterocyclic compounds	C5H9NO	99.0684	100.076	98.0611	ACN+MeOH	0.68	NA
Lauric acid	HMDB0000638	Lipids and lipid-like molecules	C12H24O2	200.178	201.185	199.17	Water	NA	0.66
Glutathione reduced	HMDB0000125	Organic acids and derivatives	C10H17N3O6S	307.084	308.091	306.077	Water	5.18	5.23
sn-glycero-3-phosphocholine	HMDB0000086	Lipids and lipid-like molecules	C8H20NO6P	257.103	258.11	256.096	ACN+MeOH	6.58	6.57
Isocitric acid	HMDB0000193	Organic acids and derivatives	C6H8O7	192.027	193.034	191.02	Water	10.63	10.62
4-Methylhippuric acid	HMDB0013292	Benzenoids	C10H11NO3	193.074	194.081	192.067	Water	0.73; 1.98	0.75; 1.98
Adenosine	HMDB0000050	Nucleosides, nucleotides, and analogues	C10H13N5O4	267.097	268.104	266.089	Water	2.4	2.39
Glucose-6-phosphate	HMDB0001401	Organic oxygen compounds	C6H13O9P	260.03	261.037	259.022	Water	7.42; 9.68; 10.33	10.3
Adenosine cyclophosphate	HMDB0000058	Nucleosides, nucleotides, and analogues	C10H12N5O6P	329.053	330.06	328.045	Water+MeOH	2.62	2.63
Glycoursodeoxycholic acid	HMDB0000708	Lipids and lipid-like molecules	C26H43NO5	449.314	450.321	448.307	Water	2.03	2.05
3-Methyladenine	HMDB0011600	Organoheterocyclic compounds	C6H7N5	149.07	150.077	148.063	Water+MeOH	2.51	3.27
Vitamin A	HMDB0000305	Lipids and lipid-like molecules	C20H30O	286.23	287.237	285.222	Water+MeOH	NA	NA
Deoxycholic acid	HMDB0000626	Lipids and lipid-like molecules	C24H40O4	392.293	393.3	391.285	Water	NA	1.4
Pyroglutamic acid	HMDB0000267	Organic acids and derivatives	C5H7NO3	129.043	130.05	128.035	Water	2.81	2.8
Menadione	HMDB0001892	Benzenoids	C11H8O2	172.052	173.06	171.045	ACN+MeOH	1.96	0.52
Stearic acid	HMDB0000827	Lipids and lipid-like molecules	C18H36O2	284.272	285.279	283.264	Water	NA	0.58
Melatonin	HMDB0001389	Organoheterocyclic compounds	C13H16N2O2	232.121	233.129	231.114	ACN+MeOH	0.59	0.61
Nicotinic acid	HMDB0001488	Organoheterocyclic compounds	C6H5NO2	123.032	124.039	122.025	Water+MeOH	2.25	2.24
Kynurenine	HMDB0000684	Organic oxygen compounds	C10H12N2O3	208.085	209.092	207.077	Water+MeOH	3.26	3.24
Histamine	HMDB0000870	Organic nitrogen compounds	C5H9N3	111.08	112.087	110.072	ACN+MeOH	8.18	8.19
3-Indolebutyric acid	HMDB0002096	Organoheterocyclic compounds	C12H13NO2	203.095	204.102	202.087	Water	0.71	0.67
Indole-3-carboxylic acid	HMDB0003320	Organoheterocyclic compounds	C9H7NO2	161.048	162.055	160.04	Water	NA	0.72
Sarcosine	HMDB0000271	Organic acids and derivatives	C3H7NO2	89.0477	90.055	88.0404	Water	4.46	4.47
5-Methylcytidine	HMDB0000982	Nucleosides, nucleotides, and analogues	C10H15N3O5	257.101	258.108	256.094	ACN+MeOH	2.76	2.74
Saccharic acid	HMDB0000663	Organic oxygen compounds	C6H10O8	210.038	211.045	209.03	Water	NA	7.64; 9.86
Folinic acid	HMDB0001562	Organoheterocyclic compounds	C20H23N7O7	473.166	474.173	472.159	ACN+MeOH	6.02	6.01
NADH	HMDB0001487	Nucleosides, nucleotides, and analogues	C21H29N7O14P2	665.125	666.132	664.117	Water+MeOH	4.82	4.8
Myristic acid	HMDB0000806	Lipids and lipid-like molecules	C14H28O2	228.209	229.216	227.202	Water+MeOH	NA	0.58
Adenosine 5'-triphosphate	HMDB0000538	Nucleosides, nucleotides, and analogues	C10H16N5O13P3	506.996	508.003	505.988	Water	10.5	10.49
Cytidine 5′-triphosphate	HMDB0000082	Organic oxygen compounds	C9H16N3O14P3	482.985	483.992	481.977	Water+MeOH	10.61	10.63
5-Methyluridine	HMDB0000884	Nucleosides, nucleotides, and analogues	C10H14N2O6	258.085	259.092	257.078	Water+MeOH	2	2.12
5-Methylcytosine	HMDB0002894	Organoheterocyclic compounds	C5H7N3O	125.059	126.066	124.052	ACN+MeOH	2.49	2.48
4-Methoxymandelic acid	HMDB0140294	Benzenoids	C9H10O4	182.058	183.065	181.051	Water	NA	0.66
Ursodeoxycholic acid	HMDB0000946	Lipids and lipid-like molecules	C24H40O4	392.293	393.3	391.285	Water	NA	0.66
Cholic acid	HMDB0000619	Lipids and lipid-like molecules	C24H40O5	408.288	409.295	407.28	Water	NA	2.18
Ribose	HMDB0000283	Organic oxygen compounds	C5H10O5	150.053	151.06	149.046	Water	NA	2.24
Sebacic acid	HMDB0000792	Lipids and lipid-like molecules	C10H18O4	202.12	203.128	201.113	Water	2.09	2.08
Ornithine	HMDB0000746	Lipids and lipid-like molecules	C5H13ClN2O2	168.067	169.074	167.059	Water	NA	NA
Adenosine 5'-monophosphate	HMDB0000045	Nucleosides, nucleotides, and analogues	C10H14N5O7P	347.063	348.07	346.056	Water+MeOH	5.85; 7.43	5.78; 7.36
Oxalic acid	HMDB0002329	Organic acids and derivatives	C2H2O4	89.9953	91.0026	88.988	Water	NA	7.95; 9.96
Uridine 5'-triphosphate	HMDB0000285	Nucleosides, nucleotides, and analogues	C9H15N2O15P3	483.969	484.976	482.961	ACN+MeOH	10.55	10.54
α-Glucose-1-phosphate	HMDB0001586	Organic oxygen compounds	C6H13O9P	260.03	261.037	259.022	Water	8.91; 9.81	8.89; 9.82
2'-Deoxyinosine	HMDB0000071	Nucleosides, nucleotides, and analogues	C10H12N4O4	252.086	253.093	251.079	ACN+MeOH	2.28	2.44
Maltose	HMDB0000163	Organic oxygen compounds	C12H22O11	342.116	343.123	341.109	Water	NA	3.78; 10.37
Allantoin	HMDB0000462	Organoheterocyclic compounds	C4H6N4O3	158.044	159.051	157.037	Water+MeOH	NA	2.44
5-Aminoimidazole-4-carboxamide	HMDB0003192	Organoheterocyclic compounds	C4H6N4O	126.054	127.061	125.047	ACN+MeOH	2.17	2.15
4-Hydroxycoumarin	HMDB0137904	Phenylpropanoids and polyketides	C9H6O3	162.032	163.039	161.024	ACN+MeOH	0.61	0.63
Glycerol monooleate	HMDB0011567	Lipids and lipid-like molecules	C21H40O4	356.293	357.3	355.285	ACN+MeOH	13.88	NA
Glucosamine-6-phosphate	HMDB0001254	Organic oxygen compounds	C6H14NO8P	259.046	260.053	258.038	Water	10.69	10.67
Caffeic acid	HMDB0001964	Phenylpropanoids and polyketides	C9H8O4	180.042	181.049	179.035	Water+MeOH	NA	2.13
trans-Cinnamic acid	HMDB0000930	Phenylpropanoids and polyketides	C9H8O2	148.052	149.06	147.045	Water+MeOH	NA	2.65
Threonic acid	HMDB0000943	Organic oxygen compounds	C4H8O5	136.037	137.044	135.03	Water	NA	6.27
(+)-Arabinose	HMDB0000646	Organic oxygen compounds	C5H10O5	150.053	151.06	149.046	Water	NA	0.74
2-Hydroxybutyric acid	HMDB0000008	Organic acids and derivatives	C4H8O3	104.047	105.055	103.04	Water+MeOH	NA	1.85
Fructose 1-phosphate	HMDB0001076	Organic oxygen compounds	C6H13O9P	260.03	261.037	259.022	Water	NA	10.47
5-Methoxytryptamine	HMDB0004095	Organoheterocyclic compounds	C11H14N2O	190.111	191.118	189.103	ACN+MeOH	3.16	3.17
L(-)-Pipecolinic acid	HMDB0000716	Organic acids and derivatives	C6H11NO2	129.079	130.086	128.072	ACN+MeOH	3.77	3.75
Cholestanol	HMDB0000908	Lipids and lipid-like molecules	C27H48O	388.37	389.378	387.363	ACN+MeOH	NA	3.28
5-Aminovaleric acid	HMDB0003355	Organic acids and derivatives	C5H11NO2	117.079	118.086	116.072	ACN+MeOH	6.27	6.25
Mannitol	HMDB0000765	Organic oxygen compounds	C6H14O6	182.079	183.086	181.072	Water	3.52	3.5
Imidazole	HMDB0001525	Organoheterocyclic compounds	C3H4N2	68.0374	69.0447	67.0302	Water	1.04	1.08
Butyric acid	HMDB0000039	Lipids and lipid-like molecules	C4H8O2	88.0524	89.0597	87.0452	Water	NA	0.72
Dihydrouracil	HMDB0000076	Organoheterocyclic compounds	C4H6N2O2	114.043	115.05	113.036	Water+MeOH	2.33	NA
2-Deoxy-ribose	HMDB0003224	Organic oxygen compounds	C5H10O4	134.058	135.065	133.051	Water	NA	1.6
2′-Deoxyguanosine	HMDB0000085	Nucleosides, nucleotides, and analogues	C10H13N5O4	267.097	268.104	266.089	Water	2.75	2.76
Taurocholic Acid	HMDB0000036	Lipids and lipid-like molecules	C26H45NO7S	515.292	516.299	514.284	Water	1.94; 2.11	1.96
Benzamide	HMDB0004461	Benzenoids	C7H7NO	121.053	122.06	120.046	Water+MeOH	0.62	NA
Mandelic acid	HMDB0000703	Benzenoids	C8H8O3	152.047	153.055	151.04	Water+MeOH	2.75	0.74
Taurodeoxycholic acid	HMDB0000896	Lipids and lipid-like molecules	C26H45NO6S	499.297	500.304	498.289	Water+MeOH	0.73	0.71
2-Aminoethanol	HMDB0000149	Organic nitrogen compounds	C2H7NO	61.0528	62.06	60.0455	Water+MeOH	NA	NA
Chenodeoxycholic acid	HMDB0000518	Lipids and lipid-like molecules	C24H40O4	392.293	393.3	391.285	Water+MeOH	NA	0.74
Pyridoxine	HMDB0000239	Organoheterocyclic compounds	C8H11NO3	169.074	170.081	168.067	Water	1.97	1.96
O-Phospho-tyrosine	HMDB0006049	Organic acids and derivatives	C9H12NO6P	261.04	262.048	260.033	Water	10.58	10.6
Vitamin D3	HMDB0000876	Lipids and lipid-like molecules	C27H44O	384.339	385.346	383.332	ACN+MeOH	0.51	NA
Tauroursodeoxycholic acid	HMDB0000874	Lipids and lipid-like molecules	C26H45NO6S	499.297	500.304	498.289	ACN+MeOH	1.67	NA
3-Methylindole	HMDB0000466	Organoheterocyclic compounds	C9H9N	131.073	132.081	130.066	ACN+MeOH	NA	0.55
Acetylcholine	HMDB0000895	Organic nitrogen compounds	C7H16NO2	146.118	147.125	145.111	ACN+MeOH	NA	NA
Decanoic acid	HMDB0000511	Lipids and lipid-like molecules	C10H20O2	172.146	173.154	171.139	ACN+MeOH	NA	0.63
2,5-Furandicarboxylic acid	HMDB0004812	Organoheterocyclic compounds	C6H4O5	156.006	157.013	154.999		NA	3.15
α-Lactose	HMDB0000186	Organic oxygen compounds	C12H22O11	342.116	343.123	341.109	Water	6.68	6.55
4-Hydroxymandelic acid	HMDB0000822	Benzenoids	C8H8O4	168.042	169.049	167.035	Water	NA	1.89
Niacinamide	HMDB0001406	Organoheterocyclic compounds	C6H6N2O	122.048	123.055	121.041	ACN+MeOH	0.73	0.74
p-Cresol	HMDB0001858	Benzenoids	C7H8O	108.058	109.065	107.05	Water	NA	0.55
Vanillin	HMDB0012308	Benzenoids	C8H8O3	152.047	153.055	151.04	Water	0.59	0.6
Glutathione oxidized	HMDB0003337	Organic acids and derivatives	C20H32N6O12S2	612.152	613.159	611.145	Water	10.66	10.65
Creatine phosphate	HMDB0001511	Organic acids and derivatives	C4H10N3O5P	211.036	212.043	210.029	Water	10	9.98
Methionine	HMDB0000696	Organic acids and derivatives	C5H11NO2S	149.051	150.058	148.044	Water	3.47	3.48
Creatinine	HMDB0000562	Organic acids and derivatives	C5H11NO2S	149.051	150.058	148.044	Water	3.97	NA
Creatine	HMDB0000064	Organic acids and derivatives	C4H9N3O2	131.07	132.077	130.062	Water	4.77	4.78
Inosine	HMDB0000195	Nucleosides, nucleotides, and analogues	C10H12N4O5	268.081	269.088	267.074	Water+MeOH	2.65	2.66
Fructose-6-phosphate	HMDB0000124	Organic oxygen compounds	C6H13O9P	260.03	261.037	259.022	Water	7.92; 9.64	7.96;9.60
5-Aminosalicylic acid	HMDB0014389	Benzenoids	C7H7NO3	153.043	154.05	152.035	Water	NA	0.58
3-Hydroxy-2-methyl-4-pyrone	HMDB0030776	Organoheterocyclic compounds	C6H6O3	126.032	127.039	125.024	Water	0.7	0.69
Docosanoic acid	HMDB0000944	Lipids and lipid-like molecules	C22H44O2	340.334	341.341	339.327	Water+MeOH	NA	0.55
3-Methylglutaric acid	HMDB0000752	Lipids and lipid-like molecules	C6H10O4	146.058	147.065	145.051	Water+MeOH	2.76	2.6
Glutaric acid	HMDB0000661	Organic acids and derivatives	C5H8O4	132.042	133.049	131.035	Water+MeOH	2.62	3.19
Anserine	HMDB0000194	Organic acids and derivatives	C10H16N4O3	240.122	241.13	239.115	Water+MeOH	9.75	9.77
trans-4-Hydroxyproline	HMDB0000725	Organic acids and derivatives	C5H9NO3	131.058	132.065	130.051	Water	4.85	4.78
Shikimic acid	HMDB0003070	Organic oxygen compounds	C7H10O5	174.053	175.06	173.046	Water	NA	3.51
Cytidine-5'-monophosphate	HMDB0000095	Nucleosides, nucleotides, and analogues	C9H14N3O8P	323.052	324.059	322.045	Water+MeOH	9.95	9.94
Cholestenone	HMDB0000921	Lipids and lipid-like molecules	C27H44O	384.339	385.346	383.332	ACN+MeOH	NA	NA
trans-Urocanic Acid	HMDB0000301	Organoheterocyclic compounds	C6H6N2O2	138.043	139.05	137.036	ACN+MeOH	2.63	2.65
Cyclohexanecarboxylic Acid	HMDB0031342	Organic acids and derivatives	C7H12O2	128.084	129.091	127.076	ACN+MeOH	NA	0.66
Sorbitol	HMDB0000247	Organic oxygen compounds	C6H14O6	182.079	183.086	181.072	Water	3.47	3.45
Guanosine 5'-monophosphate	HMDB0001397	Nucleosides, nucleotides, and analogues	C10H14N5O8P	363.058	364.065	362.051	Water	9.84	9.85
Uridine-5'-phosphoric acid	HMDB0000288	Nucleosides, nucleotides, and analogues	C9H13N2O9P	324.036	325.043	323.029	Water	5.5	5.99
Arabitol	HMDB0000568	Organic oxygen compounds	C5H12O5	152.069	153.076	151.061	ACN+MeOH	2.88	2.89
Adenosine 5'-diphosphate	HMDB0001341	Nucleosides, nucleotides, and analogues	C10H15N5O10P2	427.029	428.037	426.022	ACN+MeOH	9.22;9.98	9.23; 9.99
Purine	HMDB0001366	Organoheterocyclic compounds	C5H4N4	120.044	121.051	119.036	Water	1.29;1.67	1.27
Hexadecanoic acid	HMDB0000220	Lipids and lipid-like molecules	C16H32O2	256.24	257.248	255.233	Water	NA	0.58
Dihydroxyacetone	HMDB0001882	Organic oxygen compounds	C3H6O3	90.0317	91.039	89.0244	Water	NA	1.90; 3.51
Cyclohexanehexol	HMDB0000211	Organic oxygen compounds	C6H12O6	180.063	181.071	179.056	Water	NA	5.99
Glucuro-3,6-lactone	HMDB0006355	Organoheterocyclic compounds	C6H8O6	176.032	177.039	175.025	Water	NA	1.35
Oleic acid	HMDB0000207	Lipids and lipid-like molecules	C18H34O2	282.256	283.263	281.249	Water	NA	0.58
Glycochenodeoxycholic acid	HMDB0000637	Lipids and lipid-like molecules	C26H43NO5	449.314	450.321	448.307	Water	2.22	2.23
5-Hydroxytryptophan	HMDB0000472	Organoheterocyclic compounds	C11H12N2O3	220.085	221.092	219.077	Water+MeOH	3.73	3.72
Sinapic acid	HMDB0032616	Phenylpropanoids and polyketides	C11H12O5	224.069	225.076	223.061	Water	1.84	1.49;1.82
Hyodeoxycholic acid	HMDB0000733	Lipids and lipid-like molecules	C24H40O4	392.293	393.3	391.285	ACN+MeOH	NA	1.79
7-Dehydrocholesterol	HMDB0000032	Lipids and lipid-like molecules	C27H44O	384.339	385.346	383.332	ACN+MeOH	NA	NA
Serotonin	HMDB0000259	Organoheterocyclic compounds	C10H12N2O	176.095	177.102	175.088	Water	4.05	4.07
Spermine tetra	HMDB0001256	Organic nitrogen compounds	C10H26N4	202.216	203.223	201.208	Water	NA	NA
4-Hydroxyphenylpyruvic acid	HMDB0000707	Benzenoids	C9H8O4	180.042	181.049	179.035	Water	NA	0.71
Vitamin C	HMDB0000044	Organoheterocyclic compounds	C6H8O6	176.032	177.039	175.025	Water	NA	2.68; 2.98
Crotonic acid	HMDB0010720	Lipids and lipid-like molecules	C4H6O2	86.0368	87.0441	85.0295	MeOH	NA	0.77
2-Oxo-3-phenylpropanoic acid	HMDB0000205	Benzenoids	C9H8O3	164.047	165.055	163.04	MeOH	NA	0.63; 1.85
Sucrose	HMDB0000258	Organic oxygen compounds	C12H22O11	342.116	343.123	341.109	Water	5.2	5.2
Norleucine	HMDB0001645	Organic acids and derivatives	C6H13NO2	131.095	132.102	130.087	Water	3.08	3.09
2,3-Pyridinedicarboxylic acid	HMDB0000232	Organoheterocyclic compounds	C7H5NO4	167.022	168.029	166.015	Water+MeOH	NA	10.19
β-nicotinamide adenine dinucleotide	HMDB0000902	Nucleosides, nucleotides, and analogues	C21H27N7O14P2	663.109	664.116	662.102	Water+MeOH	9.51	9.52
Dopamine	HMDB0000073	Benzenoids	C8H11NO2	153.079	154.086	152.072	Water+MeOH	7.65	8.12
Progesterone	HMDB0001830	Lipids and lipid-like molecules	C21H30O2	314.225	315.232	313.217	MeOH	0.54	NA
2-Ketobutyric acid	HMDB0000005	Organic acids and derivatives	C4H6O3	102.032	103.039	101.024	Water	NA	0.63
Hydroxyacetic acid	HMDB0000115	Organic acids and derivatives	C2H4O3	76.016	77.0233	75.0088	Water	NA	2.44
Uridine 5'-diphosphate	HMDB0000295	Nucleosides, nucleotides, and analogues	C9H14N2O12P2	404.002	405.01	402.995	Water	10.12	10.11
Citraconic acid	HMDB0000634	Lipids and lipid-like molecules	C5H6O4	130.027	131.034	129.019	Water	0.62	0.58
p-Coumaric acid	HMDB0002035	Phenylpropanoids and polyketides	C9H8O3	164.047	165.055	163.04	MeOH	0.7	0.72
Tryptamine	HMDB0000303	Organoheterocyclic compounds	C10H12N2	160.1	161.107	159.093	MeOH	3.18	3.19
3,4,5-Trimethoxycinnamic acid	HMDB0002511	Phenylpropanoids and polyketides	C12H14O5	238.084	239.091	237.077	MeOH	0.67	0.69
3-Indoleacetonitrile	HMDB0006524	Organoheterocyclic compounds	C10H8N2	156.069	157.076	155.061	DMSO	NA	0.55
2,3-Dihydroxybenzoic acid	HMDB0000397	Benzenoids	C7H6O4	154.027	155.034	153.019		NA	0.6
Pyridoxamine	HMDB0001431	Organoheterocyclic compounds	C8H12N2O2	168.09	169.097	167.083	Water	6.98	8.2
Adipic acid	HMDB0000448	Lipids and lipid-like molecules	C6H10O4	146.058	147.065	145.051	MeOH	3.00; 6.92	2.99
2'-Deoxyadenosine	HMDB0000101	Nucleosides, nucleotides, and analogues	C10H13N5O3	251.102	252.109	250.095	ACN: MeOH: Water	2	2.09
Oxalacetic acid	HMDB0000223	Organic acids and derivatives	C4H4O5	132.006	133.013	130.999	Water	NA	10.19
O-Phosphorylethanolamine	HMDB0000224	Organic acids and derivatives	C2H8NO4P	141.019	142.026	140.012	Water	10.68	10.69
Sodium taurochenodeoxycholate	HMDB0000951	Lipids and lipid-like molecules	C26H45NO6S	499.297	500.304	498.289	MeOH	1.33	NA
Palatinitol	HMDB0029911	Lipids and lipid-like molecules	C12H24O11	344.132	345.139	343.125	Water	6.95	6.99
Trigonelline	HMDB0000875	Alkaloids and derivatives	C7H7NO2	137.048	138.055	136.04	Water	3.49	3.5
Elaidic Acid	HMDB0000573	Lipids and lipid-like molecules	C18H34O2	282.256	283.263	281.249		NA	0.58
2-Picolinic acid	HMDB0002243	Organoheterocyclic compounds	C6H5NO2	123.032	124.039	122.025	Water	NA	1.97
(−)-Cotinine	HMDB0001046	Organoheterocyclic compounds	C10H12N2O	176.095	177.102	175.088	MeOH	0.7	NA
Cytidine	HMDB0000089	Nucleosides, nucleotides, and analogues	C9H13N3O5	243.085	244.093	242.078	Water	2.88	.2.87
1,3-Dimethyluracil	HMDB0002144	Organoheterocyclic compounds	C6H8N2O2	140.059	141.066	139.051	Water	0.62	NA
Catechol	HMDB0000957	Benzenoids	C6H6O2	110.037	111.044	109.029	Water	NA	0.63; 1.77
Norvaline	HMDB0013716	Organic acids and derivatives	C5H11NO2	117.079	118.086	116.072	Water	3.43	3.45
2',4'-Dihydroxyacetophenone	HMDB0029657	Organic oxygen compounds	C8H8O3	152.047	153.055	151.04	MeOH	0.59	0.58
4-Aminophenol	HMDB0001169	Benzenoids	C6H7NO	109.053	110.06	108.046	ACN	0.62	NA
4-Aminobenzoic acid	HMDB0001392	Benzenoids	C7H7NO2	137.048	138.055	136.04		3.48	NA
Asparagine	HMDB0033780	Organic acids and derivatives	C4H8N2O3	132.054	133.061	131.046	Water	7.96;8.83	7.96;8.67
NADP+	HMDB0000217	Nucleosides, nucleotides, and analogues	C21H28N7O17P3	743.076	744.083	742.068	Water	10.58	10.62
Nervonic acid	HMDB0002368	Lipids and lipid-like molecules	C24H46O2	366.35	367.357	365.342	MeOH	NA	0.55
2'-Deoxycytidine	HMDB0000014	Nucleosides, nucleotides, and analogues	C9H13N3O4	227.091	228.098	226.083	Water	2.59	2.6
Inosine 5′-triphosphate	HMDB0000189	Nucleosides, nucleotides, and analogues	C10H15N4O14P3	507.98	508.987	506.973		10.63	10.62
Methylguanidine	HMDB0001522	Organic nitrogen compounds	C2H7N3	73.064	74.0713	72.0567	Water	4.91	NA
Linoleic Acid	HMDB0000673	Lipids and lipid-like molecules	C18H32O2	280.24	281.248	279.233	MeOH	NA	0.58
Hippuric acid	HMDB0000714	Benzenoids	C9H9NO3	179.058	180.065	178.051	MeOH	0.81;2.06	0.8
Glutamine	HMDB0003423	Organic acids and derivatives	C5H10N2O3	146.069	147.076	145.062	Water	5.94	6.95
4-Methylcatechol	HMDB0000873	Benzenoids	C7H8O2	124.052	125.06	123.045	Water	NA	0.61
Ritalinic Acid	HMDB0042008	Organic nitrogen compounds	C13H17NO2	219.126	220.133	218.119	DMSo + Water + ACN	2.51	2.49
Dehydroascorbic acid	HMDB0001264	Organoheterocyclic compounds	C6H6O6	174.016	175.024	173.009	Water	NA	0.69;2.10
Homocysteine	HMDB0000742	Organic acids and derivatives	C4H9NO2S	135.035	136.043	134.028	Water	10.59	10.69
Heneicosanoic acid	HMDB0002345	Lipids and lipid-like molecules	C21H42O2	326.318	327.326	325.311	IPA	NA	0.55
Malonic acid	HMDB0000691	Organic acids and derivatives	C3H4O4	104.011	105.018	103.004	Water	NA	1.24
Uridine	HMDB0000296	Nucleosides, nucleotides, and analogues	C9H12N2O6	244.07	245.077	243.062	Water	2.32	2.33
3-Guanidinopropionic	HMDB0013222	Organic nitrogen compounds	C4H9N3O2	131.07	132.077	130.062	Water	5.15	5.17
(+)-Tryptophan	HMDB0013609	Organoheterocyclic compounds	C11H12N2O2	204.09	205.097	203.083	Water	3.11	3.1
Vitamin D2	HMDB0000900	Lipids and lipid-like molecules	C28H44O	396.339	397.346	395.332	MeOH	NA	NA
NADPH	HMDB0000221	Nucleosides, nucleotides, and analogues	C21H30N7O17P3	745.091	746.098	744.084	Water	10.49	NA
Prednisolone	HMDB0014998	Lipids and lipid-like molecules	C21H28O5	360.194	361.201	359.186	20 % Water + 80 % MeOH	0.65	0.63
Imidazole-4(5)-acetic acid	HMDB0002024	Organoheterocyclic compounds	C5H6N2O2	126.043	127.05	125.036	DMSO + Water	3.64	3.65
Cytosine	HMDB0000630	Organoheterocyclic compounds	C4H5N3O	111.043	112.05	110.036	80 % Water + 20 % MeOH	2.53	2.54
Guanosine 5′-triphosphate	HMDB0001273	Nucleosides, nucleotides, and analogues	C10H16N5O14P3	522.991	523.998	521.983	Water	10.65	10.64
Flavone	HMDB0003075	Phenylpropanoids and polyketides	C15H10O2	222.068	223.075	221.061	80 % MeOH + 20% Water	0.56	NA
Cortisone	HMDB0002802	Lipids and lipid-like molecules	C21H28O5	360.194	361.201	359.186	90 % MeOH + 10 % Water	0.62	0.61
Riboflavin 5'-Monophosphate	HMDB0001520	Nucleosides, nucleotides, and analogues	C17H21N4O9P	456.105	457.112	455.097	Water	4.82	4.84;6.25
Carnitine	HMDB0000062	Organic nitrogen compounds	C7H15NO3	161.105	162.113	160.098	Water	5.11	5.07
Cysteamine	HMDB0002991	Organosulfur compounds	C2H7NS	77.0299	78.0372	76.0226	Water	4.37;10.34	NA
Corticosterone	HMDB0001547	Lipids and lipid-like molecules	C21H30O4	346.214	347.222	345.207	90 % MeOH + 10 % Water	0.62	0.61
Citrulline	HMDB0000904	Organic acids and derivatives	C6H13N3O3	175.096	176.103	174.088	Water	6.98	6.99
Fumaric acid	HMDB0000134	Organic acids and derivatives	C4H4O4	116.011	117.018	115.004	Alcohol	NA	0.41;3.40;3.85
Flavin Adenine Dinucleotide	HMDB0001248	Nucleosides, nucleotides, and analogues	C27H33N9O15P2	785.157	786.164	784.15	Water	4.77;5.36	4.78;5.37
2-Methylsuccinic acid	HMDB0001844	Lipids and lipid-like molecules	C5H8O4	132.042	133.049	131.035	Water	NA	1.41; 1.72
Homoarginine	HMDB0000670	Organic acids and derivatives	C7H16N4O2	188.127	189.135	187.12	Water	11.57	11.56
Phosphocholine	HMDB0001565	Organic nitrogen compounds	C5H15NO4P	184.074	185.081	183.067	Water	NA	NA
UDP-α-Glucose	HMDB0000286	Nucleosides, nucleotides, and analogues	C15H24N2O17P2	566.055	567.062	565.048	Water	NA	7.06
Phosphoserine	HMDB0000272	Organic acids and derivatives	C3H8NO6P	185.009	186.016	184.002	Water	10.65	NA
Arginine	HMDB0000517	Organic acids and derivatives	C6H14N4O2	174.112	175.119	173.104	Water	12.06	12.08
2-Methylmalonic acid	HMDB0000202	Organic acids and derivatives	C4H6O4	118.027	119.034	117.019	Water	NA	2.06
(+)-Glucosamine	HMDB0001514	Organic oxygen compounds	C6H13NO5	179.079	180.087	178.072	Water	NA	NA
Leucic acid	HMDB0000746	Lipids and lipid-like molecules	C6H12O3	132.079	133.086	131.071	MeOH	NA	1.95
Betaine	HMDB0000043	Organic acids and derivatives	C5H12NO2	118.087	119.094	117.079	Water	NA	NA
γ-Aminobutyric acid	HMDB0000112	Organic acids and derivatives	C4H9NO2	103.063	104.071	102.056	Water	5.68	NA
Adenine	HMDB0000034	Organoheterocyclic compounds	C5H5N5	135.054	136.062	134.047	Water	2.27	2.28
Indole	HMDB0000738	Organoheterocyclic compounds	C8H7N	117.058	118.065	116.051	MeOH	3.74	NA
(+)-Xylose	HMDB0000098	Organic oxygen compounds	C5H10O5	150.053	151.06	149.046	Water	NA	2.64
Succinic acid	HMDB0000254	Organic acids and derivatives	C4H6O4	118.027	119.034	117.019	Water	NA	2.06
Urea	HMDB0000294	Organic acids and derivatives	CH4N2O	60.0324	61.0396	59.0251	Water	NA	NA
Tyramine	HMDB0000306	Benzenoids	C8H11NO	137.084	138.091	136.077	Water	3.77	3.73
2-Furoic acid	HMDB0000617	Organoheterocyclic compounds	C5H4O3	112.016	113.023	111.009	Water	NA	1.72
Carnosine	HMDB0000033	Organic acids and derivatives	C9H14N4O3	226.107	227.114	225.099	Water	9.79	9.77
Undecanoic acid	HMDB0000947	Lipids and lipid-like molecules	C11H22O2	186.162	187.169	185.155	10 % Water + 90 % MeOH	NA	NA
5,6-Dimethylbenzimidazole	HMDB0003701	Organoheterocyclic compounds	C9H10N2	146.084	147.092	145.077	Water	0.62	0.61
Sodium Pantothenate	HMDB0000210	Organic acids and derivatives	C9H17NO5	219.111	220.118	218.103	Water	2.44	2.43
2'-Deoxyuridine	HMDB0000012	Nucleosides, nucleotides, and analogues	C9H12N2O5	228.075	229.082	227.067	Water	1.53	1.88
Hydrocinnamic acid	HMDB0000764	Phenylpropanoids and polyketides	C9H10O2	150.068	151.075	149.061	MeOH	NA	0.63
Stearic Acid methyl ester	HMDB0034154	Lipids and lipid-like molecules	C19H38O2	298.287	299.295	297.28		NA	NA
3-Hydroxypropionic acid	HMDB0000700	Organic acids and derivatives	C3H6O3	90.0317	91.039	89.0244	Water	NA	2.1
Histidinol	HMDB0003431	Organic nitrogen compounds	C6H11N3O	141.09	142.097	140.083	Water	7.97	7.93
1-Methyl Adenosine	HMDB0003331	Nucleosides, nucleotides, and analogues	C11H15N5O4	281.112	282.12	280.105	Water	2.06	2.12
1-Methylnicotinamide	HMDB0000699	Organoheterocyclic compounds	C7H9N2O	137.071	138.079	136.064	Water	NA	6.18
7-Methylguanosine	HMDB0001107	Nucleosides, nucleotides, and analogues	C11H16N5O5	298.115	299.122	297.108	DMSO 10% + 90 % Water	NA	NA
4,5-Dimethyl-3-hydroxy-2,5-dihydrofuran-2-one	HMDB0031306	Organoheterocyclic compounds	C6H8O3	128.047	129.055	127.04	Water	NA	NA
4-methylcyclohexanone	HMDB0031540	Organic oxygen compounds	C7H12O	112.089	113.096	111.082	Water	NA	NA
Palmitoleic acid	HMDB0003229	Lipids and lipid-like molecules	C16H30O2	254.225	255.232	253.217	Water	NA	NA
2-Methyl-1-propanol	HMDB0006006	Organic oxygen compounds	C4H10O	74.0732	75.0804	73.0659	Water	NA	NA
Spermidine	HMDB0001257	Organic nitrogen compounds	C7H19N3	207.259	208.267	206.252	Water	NA	NA
Lysine	HMDB0000182	Organic acids and derivatives	C6H14N2O2	146.106	147.113	145.098	Water	11.51	11.5
Histidine	HMDB0000177	Organic acids and derivatives	C6H9N3O2	155.07	156.077	154.062	Water	10.77	10.45
Phenylalanine	HMDB0000159	Organic acids and derivatives	C9H11NO2	165.079	166.086	164.072	Water	3.06	3.05
Tyrosine	HMDB0000158	Organic acids and derivatives	C9H11NO3	181.074	182.081	180.067	Water	3.73	3.74
Supplementary Table 1: Information on the standards used in this study containing name, HMDB, superclass, mass, precursor masses and RT. All standards were purchased from MetaSci, USA

## Sheet: S-Table 2
Table 13: Information on all standards measured on Z-HILIC including name, mass, precursor masses and RT
Metabolite name	Mass	M+H	M-H	RT min (positive mode Z-HILIC)	RT min(negative mode Z-HILIC)
1-Methyl Adenosine	281.112	282.12	280.105	2.28	2.3
2,5-Furandicarboxylic acid	156.006	157.013	154.999	NA	9.38
2′-Deoxyguanosine	267.097	268.104	266.089	3.16	3.15
2'-Deoxyadenosine	251.102	252.109	250.095	2.37	2.35
2'-Deoxycytidine	227.091	228.098	226.083	2.94	2.95
2'-Deoxyinosine	252.086	253.093	251.079	2.65	2.64
2'-Deoxyuridine	228.075	229.082	227.067	NA	2.3
3-Guanidinopropionic	131.07	132.077	130.062	7.34	7.36
3-Indoleacetonitrile	156.069	157.076	155.061	NA	0.59
3-Methyladenine	149.07	150.077	148.063	2.54	2.55
5-Aminoimidazole-4-carboxamide	126.054	127.061	125.047	2.7	2.69
5-Aminovaleric acid	117.079	118.086	116.072	9.11	9.13
5-Methoxytryptamine	190.111	191.118	189.103	3.21	3.22
5-Methylcytidine	257.101	258.108	256.094	3.01	3.02
5-Methylcytosine	125.059	126.066	124.052	2.64	2.65
5-Methyluridine	258.085	259.092	257.078	2.39	2.38
6Phosphogluconic acid	276.025	277.032	275.017	10.63	10.64
Adenosine	267.097	268.104	266.089	2.53	2.52
Adenosine cyclophosphate	329.053	330.06	328.045	3.55	3.56
Biotin	244.088	245.095	243.081	3.22	3.2
Creatine anhydrous	131.07	132.077	130.062	6.27	6.26
Cytidine	243.085	244.093	242.078	3.37	3.36
Cytidine 5′-triphosphate	482.985	483.992	481.977	10.68	10.7
Cytidine-5'-monophosphate	323.052	324.059	322.045	10.46	10.45
Cytosine	111.043	112.05	110.036	2.88	2.86
D(−)-3-Phosphoglyceric acid	185.993	187	184.986	NA	10.59
(+)-Tryptophan	204.09	205.097	203.083	3.57	3.55
Arabitol	152.069	153.076	151.061	3.58	3.54
Fructose 1,6-bisphosphate	339.996	341.003	338.989	10.7	10.69
Glucosamine-6-phosphate	259.046	260.053	258.038	10.66	10.67
Glucose-6-phosphate	260.03	261.037	259.022	10.56	10.58
Glutamine	146.069	147.076	145.062	7.43	7.45
Dihydroxyacetone	90.0317	91.039	89.0244	NA	3.02
Leucine	131.095	132.102	130.087	3.28	3.3
Homocysteine	135.035	136.043	134.028	4.31	4.33
Kynurenine	208.085	209.092	207.077	3.35	3.33
Proline	115.063	116.071	114.056	4.42	4.44
Sorbitol	182.079	183.086	181.072	4.23	4.25
Folinic acid	473.166	474.173	472.159	10.44	10.45
Fumaric acid	116.011	117.018	115.004	NA	10.14
Glutaric acid	132.042	133.049	131.035	NA	9.28
Glycine	75.032	76.0393	74.0248	7.13	7.15
Glycochenodeoxycholic acid	449.314	450.321	448.307	2.31	2.32
Glycoursodeoxycholic acid	449.314	450.321	448.307	2.32	2.33
Guanosine 5′-triphosphate	522.991	523.998	521.983	10.71	10.7
Guanosine 5'-monophosphate	363.058	364.065	362.051	10.52	10.53
Histamine	111.08	112.087	110.072	9.75	9.74
Imidazole	68.0374	69.0447	67.0302	1.44	1.42
Imidazole-4(5)-acetic acid	126.043	127.05	125.036	5.45	5.46
Indole	117.058	118.065	116.051	NA	NA
Indole-3-carboxylic acid	161.048	162.055	160.04	1939-02-01	2.18
Inosine	268.081	269.088	267.074	2.98	3
L(-)-Pipecolinic acid	129.079	130.086	128.072	4.21	4.23
5-Hydroxytryptophan	220.085	221.092	219.077	5.4	5.38
Anserine	240.122	241.13	239.115	10.41	10.39
Arginine	174.112	175.119	173.104	11.78	11.79
Carnosine	226.107	227.114	225.099	10.55	10.56
Glutamic Acid	147.053	148.06	146.046	8.75	8.73
Glutathione oxidized	612.152	613.159	611.145	10.64	10.65
Homoarginine	188.127	189.135	187.12	11.74	11.76
Lysine	146.106	147.113	145.098	11.69	11.71
Methionine	149.051	150.058	148.044	3.76	3.74
Norleucine	131.095	132.102	130.087	3.24	3.26
Norvaline	117.079	118.086	116.072	3.9	3.89
Phenylalanine	165.079	166.086	164.072	3.17	3.19
Proline	115.063	116.071	114.056	4.43	4.42
Pyroglutamic acid	129.043	130.05	128.035	3.81	3.76
Serine	105.043	106.05	104.035	7.68	7.66
Threonine	119.058	120.066	118.051	6.02	6.01
Tyrosine	181.074	182.081	180.067	4.54	4.56
Valine	117.079	118.086	116.072	4.15	4.17
Maltotriose	504.169	505.176	503.162	10.49	10.5
Mannitol	182.079	183.086	181.072	4.35	4.37
Methylguanidine	73.064	74.0713	72.0567	5.43	NA
NADH	665.125	666.132	664.117	9.23	9.22
NADP+	743.076	744.083	742.068	10.61	10.62
Nicotinic acid	123.032	124.039	122.025	2.96	2.95
O-Phospho-tyrosine	261.04	262.048	260.033	10.64	10.62
O-Phosphorylethanolamine	141.019	142.026	140.012	10.62	10.6
Palatinitol	344.132	345.139	343.125	8.44	8.48
Progesterone	314.225	315.232	313.217	0.52	NA
Purine	120.044	121.051	119.036	2.21	2.19
Pyridoxine	169.074	170.081	168.067	2.24	2.25
Ritalinic Acid	219.126	220.133	218.119	2.58	2.57
Sarcosine	89.0477	90.055	88.0404	5.4	5.39
Sebacic acid	202.12	203.128	201.113	3.6	3.61
Serotonin	176.095	177.102	175.088	5.8	5.82
sn-glycero-3-phosphocholine	257.103	258.11	256.096	8.92	8.93
Sodium taurochenodeoxycholate	499.297	500.304	498.289	2.2	2.16
Sucrose	342.116	343.123	341.109	6.74	6.69
Taurine	125.015	126.022	124.007	5.72	5.73
Taurocholic Acid	515.292	516.299	514.284	2.37	2.39
trans-4-Hydroxyproline	131.058	132.065	130.051	5.88	5.86
trans-Urocanic Acid	138.043	139.05	137.036	4.49	4.47
Trigonelline	137.048	138.055	136.04	3.94	3.96
Tryptamine	160.1	161.107	159.093	3.33	3.34
Tyramine	137.084	138.091	136.077	4.01	3.99
Uridine 5'-diphosphate	404.002	405.01	402.995	10.53	10.55
Uridine 5'-triphosphate	483.969	484.976	482.961	10.66	10.65
α-Lactose	342.116	343.123	341.109	7.9	7.94
β-nicotinamide adenine dinucleotide	663.109	664.116	662.102	10.06	10.08
Supplementary Table 2: Information on the standards used in this study (Z-HILIC) containing name, HMDB, superclass, mass, precursor masses and RT. All standards were purchased from MetaSci, USA

## Sheet: S-Table 3
Compound name and labelling	Identifier	Molecular formula	Internal Standard	Selected as reference compound
Alanine (13C3, 99%; 15N, 99%)	(EC-No.) 200-273-8 (Unlabeled)	[13]C3H7[15]NO2	Labeled Amino Acid	no
Lysine (13C6, 99%; 15N2, 99%)	(CAS-No.) 657-26-1 (Unlabeled)	[13]C6H14[15]N2O2	Labeled Amino Acid	no
Histidine (<5% D) (13C6, 97-99%; 15N3, 97-99%)	(CAS-No.) 5934-29-2 (Unlabeled)	[13]C6H9[15]N3O2	Labeled Amino Acid	no
Arginine(13C6, 99%; 15N4, 99%)	(CAS-No.) 202468-25-5	[13]C6H14[15]N4O2	Labeled Amino Acid	no
Tyrosine (13C9, 99%; 15N, 99%)	(CAS-No.) 202407-26-9	[13]C9H11[15]NO3	Labeled Amino Acid	yes
Phenylalanine (13C9, 99%; 15N, 99%)	(CAS-No.) 63-91-2 (Unlabeled)	[13]C9H11[15]NO2	Labeled Amino Acid	yes
Methionine (13C5, 99%; 15N, 99%)	(CAS-No.) 63-68-3 (Unlabeled)	[13]C5H11[15]NO2S	Labeled Amino Acid	yes
Glutamic acid (13C5, 99%; 15N, 99%)	(CAS-No.) 56-86-0 (Unlabeled)	[13]C5H9[15]NO4	Labeled Amino Acid	no
Aspartic acid (13C4, 99%; 15N, 99%)	(CAS-No.) 202468-27-7	[13]C4H7[15]NO4	Labeled Amino Acid	no
Leucine (13C6, 99%; 15N, 99%)	(CAS-No.) 202406-52-8	[13]C6H13[15]NO2	Labeled Amino Acid	no
Isoleucine (13C6, 99%; 15N, 99%)	(CAS-No.) 73-32-5 (Unlabeled)	[13]C6H13[15]NO2	Labeled Amino Acid	no
Valine (13C5, 99%; 15N, 99%)	(CAS-No.) 72-18-4 (Unlabeled)	[13]C5H11[15]NO2	Labeled Amino Acid	yes
Threonine (13C4, 97-99%; 15N, 97-99%)	(CAS-No.) 72-19-5 (Unlabeled)	[13]C4H9[15]NO3	Labeled Amino Acid	yes
Cystine (13C6, 99%; 15N2, 99%)	(CAS-No.) 1252803-65-8	[13]C6H12[15]N2O4S2	Labeled Amino Acid	no
Proline (13C5, 99%; 15N, 99%)	(CAS-No.) 147-85-3 (Unlabeled)	[13]C5H9[15]NO2	Labeled Amino Acid	yes
Serine (13C3, 99%; 15N, 99%)	(CAS-No.) 202407-34-9	[13]C3H7[15]NO3	Labeled Amino Acid	yes
Glycine(13C2, 99%; 15N, 99%)	(CAS-No.) 211057-02-2	[13]C2H5[15]NO2	Labeled Amino Acid	yes
Amritriptyline	(CAS-No.) 549-18-8	C20H23N	Drug	no
Sulfachloropyridazine	(CAS-No.) 80-32-0	C10H9ClN4O2S	Drug	no
Supplementary Table 3: Information on internal standards used in this study showing the name, an identifier the molecular formula, the internal standard group and the selection of reference compounds

## Sheet: S-Table 4
a) Negative mode										b) positive ion mode
Metabolite name	1950 NIST SRM concentration in µM	1950 NIST SRM error in µM	RC Glycine	RC Proline	RC Valine	RC Methionine	RC Tyrosine	RC Phenylalanine		Metabolite name	1950 NIST SRM concentration in µM	1950 NIST SRM error in µM	RC Glycine	RC Serine	RC Threonine	RC Valine	RC Proline	RC Phenylalanine
Glycine	245	±16	131.131	1444.94	491.819	292.175	180.942	137.263		Glycine	245	±16	88.8652	125.6	87.5948	88.2742	59.8342	39.3641
Lysine	140	±14	17.147	192.474	63.5409	38.0449	23.3235	17.9469		Lysine	140	±14	13.2706	17.1553	12.4737	12.6178	8.45325	5.56696
Methionine	22.3	±1.8	11.2686	122.224	42.5608	25.0459	15.4121	11.7343		Methionine	22.3	±1.8	25.3529	35.5575	24.8152	25.0594	16.9733	11.1333
Proline	177	±9	18.682	231.606	60.8571	38.8116	19.6104	19.1076		Proline	177	±9	225.42	322.177	223.797	225.336	152.176	100.385
Serine	95.9	±4.3	42.6778	471.258	159.252	94.8124	58.2685	44.5868		Serine	95.9	±4.3	41.1163	54.2057	38.9344	39.4023	26.5121	17.4095
Threonine	119.5	±6.1	76.7422	843.996	284.273	170.16	104.137	79.9757		Threonine	119.5	±6.1	54.7322	77.582	54.0945	54.5107	36.8723	24.2829
Tyrosine	57.3	±3	12.325	140.717	44.7936	26.9725	15.6931	12.7164		Tyrosine	57.3	±3	103.119	148.411	102.449	103.28	69.833	45.9578
Valine	182.2	±10.4	43.12	472.761	157.513	95.132	57.334	44.7404		Valine	182.2	±10.4	120.259	173.205	119.869	120.699	81.6263	53.8391
Arginine	81.4	±2.3	9.35209	104.349	34.9523	20.8071	12.8047	9.78566		Arginine	81.4	±2.3	16.1491	20.9963	15.2121	15.3927	10.3069	6.77943
Phenylalanin	51	±7	40.3893	439.822	151.831	89.6029	54.6048	41.9257		Phenylalanin	51	±7	71.9432	101.199	70.5035	71.1946	48.1516	31.5709
Homocysteine	8.5	±0.2	2.26354	24.0204	8.72968	5.09864	3.19796	2.36062		Homocysteine	8.5	±0.2	6.2502	8.76373	6.13006	6.18511	4.17434	2.74719
Supplementary Table 4: a) Comparison of NIST standard reference material metabolite values from literature with RRF quantification using 6 reference compounds in positive ESI.
Supplementary Table 4: b) Comparison of NIST standard reference material metabolite values from literature with RRF quantification using 6 reference compounds in positive ESI.
